# Supplementary material for: Tegumentary Leishmaniasis in Northeastern Italy from 2017 to 2020: A Neglected Public Health Issue
Source: MDPI journal article supplement (doi:10.3390/ijerph192316047), 2022-11-30
Supplement: s1 [file s1]

## Supplementary Material

**Table S1.** Network of diagnostic centres for the surveillance of tegumentary leishmaniasis, Emilia-Romagna region (northeastern Italy), 2017-2020.

| Diagnostic Unit                  | Hospital Name                                                  | Number of cases |
|----------------------------------|----------------------------------------------------------------|-----------------|
| Piacenza                         | Azienda USL di Piacenza-Ospedale Civile Piacenza               | 1               |
| Parma                            | Azienda Ospedaliero-Universitaria di Parma                     | 13              |
| Reggio Emilia                    | Azienda USL- IRCCS Reggio Emilia-Arcispedale Santa Maria Nuova | 10              |
| Modena                           | Azienda Ospedaliero-Universitaria Policlinico di Modena        | 40              |
| Bologna                          | IRCCS/Azienda Ospedaliero-Universitaria di Bologna             | 35              |
| Ferrara                          | Azienda Ospedaliero-Universitaria di Ferrara                   | 0               |
| Ravenna                          | Azienda USL della Romagna-Ospedale di Ravenna                  | 5               |
| Forlì                            | Azienda USL della Romagna-Ospedale Morgagni Forlì              | 6               |
| Cesena                           | Azienda USL della Romagna-Ospedale Bufalini di Cesena          | 12              |
| Rimini                           | Azienda USL della Romagna-Ospedale di Rimini                   | 13              |
| Total number of cases, 2017-2020 |                                                                | 135             |

**Table S2.** Primers and probes employed for molecular diagnosis of tegumentary leishmaniasis (real-time PCR).

| Gene target                                    | Primer sequences                                                 | Probe sequences                                    |
|------------------------------------------------|------------------------------------------------------------------|----------------------------------------------------|
|                                                | (Forward-Reverse)                                                |                                                    |
| Small-subunit<br>ribosomal RNA<br>(rRNA) gene  | 5'-AAGTGCTTTCCCATCGCAACT-3'<br>5'-GACGCACTAAACCCCTCCAA-3'        | 5'-FAM-<br>CGGTTTCGGTGTGTGGCGCC-3'                 |
| Kinetoplast (k)DNA                             | 5'-CTTTTCTGGTCCTCCGGGTAGG-3'<br>5'-CCACCCGGCCCTATTTTACACCAA-3'   | 5'-FAM-<br>TTTTCGCAGAACGCCCTACC<br>CGC-3'          |
| $\beta$ 2-microglobulin<br>(housekeeping gene) | 5'-TGAGTATGCCTGCCGTGTGA-3'<br>5'-ACTCATACACAACCTTTCAGCAGCTTAC-3' | 5'- FAM-<br>CCATGTGACTTTGTCACAGCC<br>CAAGATAGTT-3' |

**Table S3.** Delay in the diagnosis and notification status of tegumentary leishmaniasis cases in the Emilia-Romagna region (northeastern Italy) (n=92).

| Lesion<br>onset/diagnosis<br>time gap | Public health notification |    | Total cases (%) |
|---------------------------------------|----------------------------|----|-----------------|
|                                       | yes                        | no |                 |
| <= 1 month                            | 9                          | 0  | 9 (10%)         |
| 1-3 months                            | 11                         | 4  | 15 (16%)        |
| 3-6 months                            | 26                         | 6  | 32 (35%)        |
| 6-12 months                           | 28                         | 2  | 30 (33%)        |
| >12 months                            | 6                          | 0  | 6 (7%)          |
| Total                                 | 80                         | 12 | 92 (100%)       |

**Table S4.** Diagnosis of tegumentary leishmaniasis by histology (n=118) and/or by PCR (n=103).

|                                |          | <b>Histology</b>     |                      |                 | <b>Total</b> |
|--------------------------------|----------|----------------------|----------------------|-----------------|--------------|
|                                |          | <b>Amastigotes +</b> | <b>Amastigotes -</b> | <b>Not done</b> |              |
| <b>Molecular<br/>diagnosis</b> | PCR+     | 57                   | 26                   | 17*             | 100          |
|                                | PCR-     | 3                    | 0                    | 0               | 3            |
|                                | Not done | 32                   | 0                    | 0               | 32           |
| Total                          |          | 92                   | 26                   | 17              |              |

\*11 out of 17 cases were not reported to the public health service.

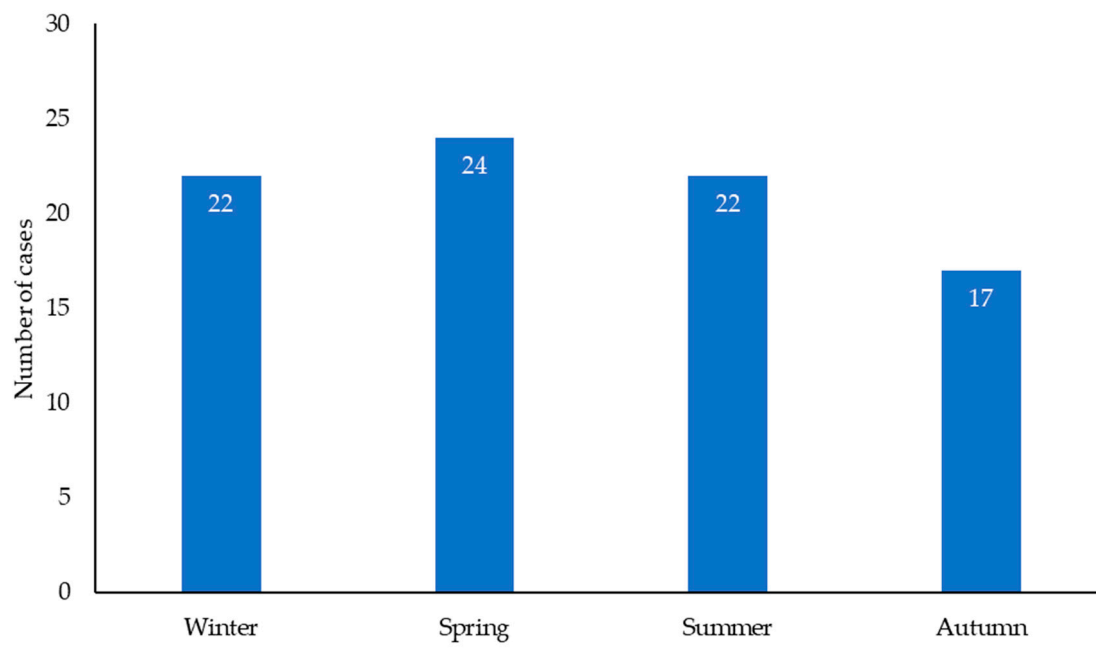

**Figure S1.** Seasonal distribution of tegumentary leishmaniasis based on lesions onset. Data on lesion onset were available for n= 85 TL cases.

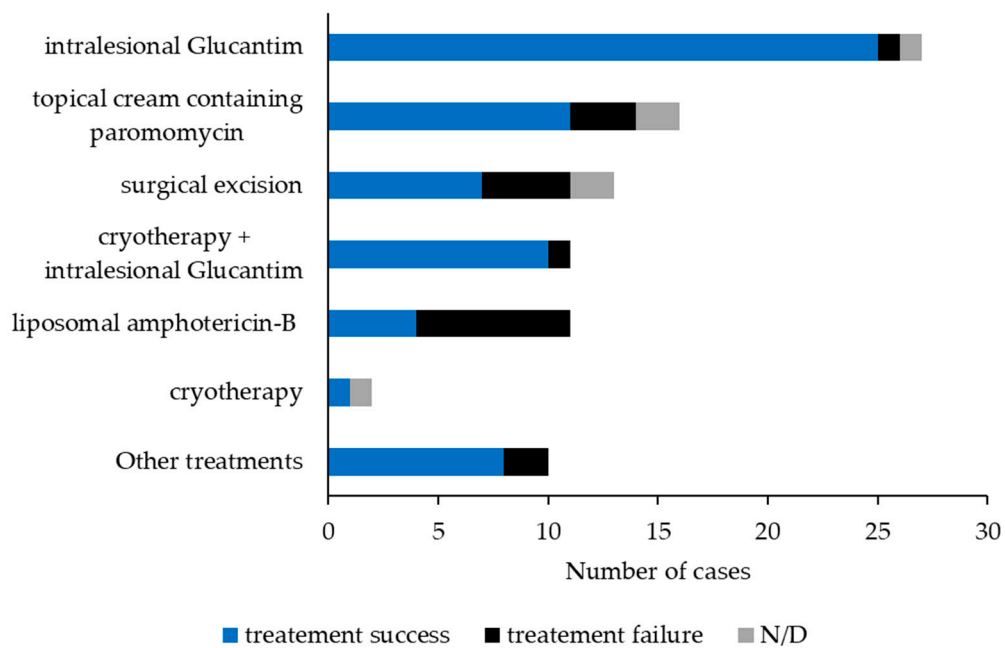

**Figure S2.** Treatment failure in different therapeutic approaches for n=84 cases of tegumentary leishmaniasis in the Emilia-Romagna region, northeastern Italy, 2017-2020. ND; not defined
